# Supplementary material
Source: PubMed Central journal article supplement (PMC314170)

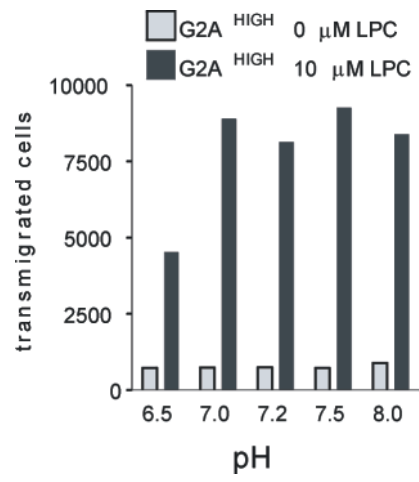

Supplement: pnas_101_1_245__3.pdf [file pnas_101_1_245__3.pdf]
